# Supplementary material for: Photodynamic Inactivation Effectively Eradicates Candida auris Biofilm despite Its Interference with the Upregulation of CDR1 and MDR1 Efflux Genes
Source: MDPI journal article supplement (doi:10.3390/jof8111137), 2022-10-27
Supplement: s1 [file s1]

# Photodynamic inactivation effectively eradicates *Candida auris* biofilm despite its interference with the upregulation of *CDR1* and *MDR1* efflux genes

Matúš Štefánek<sup>1</sup>, Lucia Černáková<sup>1</sup>, Jaroslava Dekkerová<sup>1</sup> and Helena Bujdaková<sup>1,\*</sup>

<sup>1</sup> Department of Microbiology and Virology, Faculty of Natural Sciences, Comenius University in Bratislava, 842 15 Bratislava, Slovakia

\* Correspondence: helena.bujdakova@uniba.sk; Tel.: +421-2-9014-9436, <https://orcid.org/0000-0002-9219-0803>

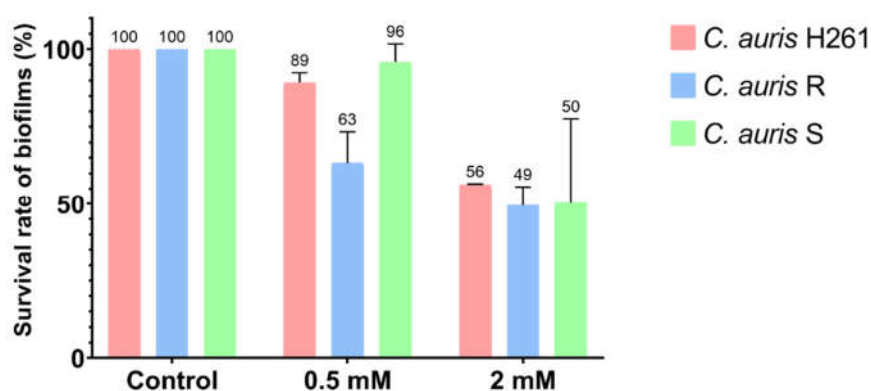

**Figure S1.** Effectiveness of 2 and 0.5 mM MB in dark on *C. auris* H261, *C. auris* R and *C. auris* S.

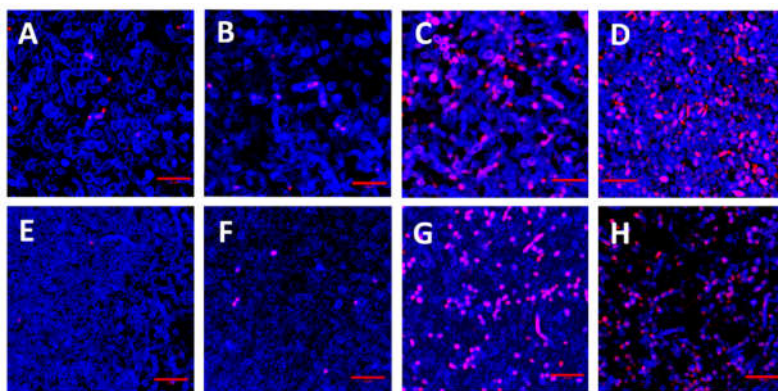

**Figure S2.** CLSM was performed on *C. auris* S (top row, A-D) and *C. auris* R (bottom row, E-H) before and after PDI in the presence of 0.25 mM MB; control 24-h biofilms (A, E); MB Dark groups (B, F); MB groups irradiated for 120s (C, G); and 300s (D, H). Bars represent 20 µm. The cell wall was stained with CW (1 µg/mL) and dead cells were stained with PI (0.1 µg/mL).
